1 **Experimental increases in glucocorticoids alter function of the neuroendocrine stress axis in wild red**  
2 **squirrels without negatively impacting survival and reproduction**

3 Freya van Kesteren<sup>1\*</sup>, Brendan Delehanty<sup>2</sup>, Sarah E. Westrick<sup>1</sup>, Rupert Palme<sup>3</sup>, Rudy Boonstra<sup>2</sup>, Jeffrey E.  
4 Lane<sup>4</sup>, Stan Boutin<sup>5</sup>, Andrew G. McAdam<sup>6</sup>, Ben Dantzer<sup>1,7</sup>

5 1. Department of Psychology, University of Michigan, MI 48109 Ann Arbor, Michigan, USA

6 2. Department of Biological Sciences, University of Toronto Scarborough, Toronto, Ontario, M1C 1A4 Canada

7 3. Department of Biomedical Sciences, University of Veterinary Medicine, A-1210 Vienna, Austria

8 4. Department of Biology, University of Saskatchewan, Saskatoon, SK S7N 5E2, Canada

9 5. Department of Biological Sciences, University of Alberta, Edmonton, Alberta, Canada T6G 2E9

10 6. Department of Integrative Biology, University of Guelph, Guelph, Ontario, Canada N1G 2W1

11 7. Department of Ecology and Evolutionary Biology, University of Michigan, MI 48109, Ann Arbor, Michigan,  
12 USA

13 \*Corresponding author: [Freyavankesteren@gmail.com](mailto:Freyavankesteren@gmail.com)

14

15 **Abstract**

16 Hormones including glucocorticoids (stress hormones) are well known for their effects on animal  
17 behavior and life history traits, and this understanding has come through both correlative and  
18 manipulative studies. While the latter offers a higher level of control (and ability to assign causality),  
19 there are important methodological concerns that are often not considered when manipulating  
20 hormones, including glucocorticoids, in wild animals. In this study, we examined how experimental  
21 elevations of cortisol concentrations in wild North American red squirrels (*Tamiasciurus hudsonicus*)  
22 affected their hypothalamic–pituitary–adrenal (HPA) axis reactivity, and life history traits including body  
23 mass, litter survival, and adult survival. The effects of exogenous cortisol on plasma cortisol  
24 concentrations depended on the time between treatment consumption and blood sampling. In the first  
25 nine hours after consumption of exogenous cortisol, individuals had significantly higher true baseline  
26 plasma cortisol concentrations, but adrenal gland function was impaired. Approximately 24 hours after  
27 consumption of exogenous cortisol, individuals had much lower plasma cortisol concentrations than  
28 controls, but adrenal function was restored. Corticosteroid binding globulin (CBG) concentrations were  
29 also significantly reduced in squirrels treated with cortisol. Despite these profound shifts in the  
30 functionality of the neuroendocrine stress axis, fitness proxies including squirrel body mass, offspring  
31 survival, and adult survival were unaffected by experimental increases in cortisol concentrations. Our  
32 results highlight that even short-term experimental increases in glucocorticoids can affect adrenal gland  
33 functioning and CBG concentrations, but may have no side-effects on proxies of fitness.

34

35 **Keywords:** cortisol, hormone manipulations, hypothalamic–pituitary–adrenal (HPA) axis, North  
36 American red squirrels

## 37 **1. Introduction**

38 Associations between glucocorticoids (stress hormones) and life history or behavioral traits are  
39 being increasingly studied, due to their role as a mechanistic link between the genome and the  
40 environment, and to uncover general relationships between hormones and fitness (Breuner et al., 2008;  
41 Dantzer et al., 2016). Glucocorticoids (hereafter GCs), in particular, are receiving heightened focus,  
42 because of the widespread relevance of the stress response mediated by the hypothalamic-pituitary-  
43 adrenal (HPA) axis (Sapolsky et al., 2000). This includes documented effects of GCs on behavior and other  
44 traits (e.g. DeNardo and Sinervo, 1994; Ebensperger et al., 2011). Correlational studies have helped  
45 advance our understanding of the relationships between GCs and phenotypic traits, but establishing the  
46 causality of such relationships requires experimental manipulation (e.g. artificially elevating GCs). In  
47 laboratory settings, hormone manipulations are logistically feasible (e.g. Karatsoreos et al., 2010; Lussier  
48 et al., 2009), but experimental studies conducted in wild populations are likely to provide better insights  
49 into the ecologically relevant effects of GCs on life history variation.

50 Hormone manipulations in wild animals are more challenging than in the laboratory, but several  
51 methods have been developed (see Sopinka et al., 2015). That said, exogenous GCs may have unintended  
52 physiological side effects, which may influence or skew interpretation of the results obtained from  
53 manipulative studies. Although detailed studies about the potential complications of manipulating  
54 hormones in wild animals have not been performed, these issues were highlighted 10 years ago (Fusani,  
55 2008). One potential problem with hormone manipulations is related to the fact that the endocrine  
56 system is a homeostatic system that is controlled by negative feedback mechanisms, and tends to  
57 compensate for disruption. Therefore, if animals are treated with a hormone, the endogenous  
58 production of the hormone may be reduced after a few days, and longer treatment duration may lead

59 to the regression of the endocrine gland, and have important consequences for endocrine homeostasis  
60 (Fusani, 2008). Such effects are well documented in humans, as both cortisol and synthetic GCs (which  
61 may be more potent, see Meikle and Tyler, 1977), are used to treat a range of ailments (Arabi et al.,  
62 2010; Kirwan et al., 2007). Such treatments may lead to side-effects, including suppression of the HPA  
63 axis and reduced adrenal function (Broide et al., 1995; Feiwei et al., 1969; Jacobs et al., 1983). Although  
64 such side-effects are usually temporary (Morris and Jorgensen, 1971; Streck and Lockwood, 1979), in  
65 extreme cases, patients may develop more severe and long term conditions such as Cushing's syndrome  
66 (symptoms include obesity, poor wound healing, and hypertension, see Axelrod, 1976). In other cases,  
67 GC therapy may cause secondary adrenal insufficiency and lead to Addison's disease (Arlt and Allolio,  
68 2003). If GC manipulations affect the adrenal glands, endogenous production of GCs, and endocrine  
69 homeostasis, this may lead to unintended consequences in wild animals. This could jeopardize the value  
70 of performing such studies, as they could adversely influence survival and reproduction. Indeed, some  
71 studies indicate that elevations in stress hormones reduce estimates of fitness (Bonier et al., 2009;  
72 Breuner et al., 2008; Wingfield et al., 1998), but it is unclear if this is due to an unintended complication  
73 from the manipulation rather than a natural consequence of increased stress hormones.

74 We examined how exogenous cortisol affected the HPA axis and life history traits of North  
75 American red squirrels (*Tamiasciurus hudsonicus*). We expected that exogenous cortisol would increase  
76 plasma cortisol concentrations, but that, as may be the case in humans receiving GC therapy, HPA axis  
77 responsiveness would decrease. We expected that exogenous cortisol might lead to increased body mass  
78 in squirrels (Axelrod, 1976), but did not expect our treatment dosages to be sufficiently high to cause  
79 anorexia through sustained adrenal impairment (Arlt and Allolio, 2003). As we aimed to keep

80 physiological stress within a ‘normal’ range for this species, we did not expect to see negative effects of  
81 our treatments on body mass or adult or litter survival.

## 82 **2. Materials and Methods**

### 83 *2.1 Study population*

84 We studied a natural population of red squirrels in the Yukon, Canada (61°N, 138°W) that has  
85 been monitored since 1987 (Boutin et al., 2006; McAdam et al., 2007). All squirrels in this population are  
86 individually identified by a unique ear tag in each ear, as well as a unique color combination of colored  
87 wires attached to each ear tag which allow researchers to identify individuals from a distance. Squirrels  
88 were live-trapped (Tomahawk Live Trap Co., WI, USA), during which they were weighed using a Pesola  
89 spring balance, and fecal samples were collected from underneath traps, placed on ice, and stored at -  
90 20 °C upon return to the field station (Dantzer et al., 2010). Female and male reproductive condition was  
91 assessed through abdominal palpation (see McAdam et al., 2007).

### 92 *2.2 GC manipulations*

93 In 2015, and 2016, squirrels were randomly allocated to either control (8 g all natural peanut  
94 butter, 2 g wheat germ, no cortisol) or cortisol treatments (8 g peanut butter, 2 g wheat germ with 6, 8,  
95 or 12 mg of cortisol [H4001, Sigma Aldrich, USA]). Dosages of 0, 6, and 12 mg cortisol were selected  
96 following Dantzer et al. (2013), who based their selected dosages on previous studies in similar sized  
97 rodents that showed that a dose of 12 mg/day of cortisol induces chronic mild stress (Casolinia et al.,  
98 1997; Catalani et al., 2002; Mateo, 2008). We also added an intermediate dose of 8 mg cortisol/day.  
99 Cortisol was provided to squirrels as 10 g dosages placed in buckets hung from trees in squirrel territories  
100 (for details, see Dantzer et al., 2013). To ensure that target squirrels (identifiable through ear tags/radio-

101 collars) were consuming the treatments, camera traps (Reconyx PC900 HyperFire Professional Covert IR)  
102 were placed by the buckets of 31 squirrels for 5 days. Out of 155 d of camera trapping, conspecific  
103 pilferage was only observed ten times, and there was one case of heterospecific pilferage by a grey jay  
104 (*Perisoreus canadensis*). Consumption of each treatment was estimated daily by checking buckets for  
105 any leftovers and estimating these as a percentage. Squirrels consumed on average 91.9% of their total  
106 peanut butter treatments (median = 100%, SD = 12.13%, range = 43-100%).

### 107 *2.3 Effects of exogenous cortisol on fecal glucocorticoid metabolites (FGM)*

108 To evaluate the effects of cortisol treatments on FGM, fecal samples were collected in 2015 and  
109 2016 from male and female squirrels fed with 0, 6, 8, and 12 mg cortisol/day (Table 1). Glucocorticoid  
110 metabolites from fecal samples were extracted and assayed as previously validated and described  
111 (Dantzer et al., 2011, 2010) using a 5 $\alpha$ -pregnane-3 $\beta$ ,11 $\beta$ ,21-triol-20-one enzyme immunoassay (Touma  
112 et al., 2003). Intra- and inter-assay CVs for pools diluted 1:250 (n = 13 plates) were 7.4% and 15.4%. For  
113 pools diluted 1:500 (n = 13 plates) this was 7.5% and 17.9%. Pools diluted 1:100 (n = 9 plates) had intra  
114 and inter-assay CVs of 10.0% and 17.9%, and for pools diluted at 1:700 (n = 9 plates) this was 6.4% and  
115 18.9%. Samples from control (n = 135) or cortisol (n = 237) treated squirrels included those collected  
116 before, during, and after treatment.

### 117 *2.4 Effects of exogenous cortisol on plasma cortisol, corticosteroid binding globulin, and HPA axis*

118 Non-breeding male squirrels were fed cortisol (8 mg/day) or control treatments for one (n = 40)  
119 or two weeks (n = 26). Eighteen squirrels were included in both spring/summer (mid-April to mid-July)  
120 and autumn 2016 (mid-September to early October, with treatments switched between periods, with  
121 the exception of two squirrels fed GCs twice and one squirrel fed control treatments twice, due to human

122 error). The time that squirrels consumed their treatments was estimated by checking buckets at intervals  
123 between 25 minutes and a few hours (shown as hours:min, mean = 1:53 hrs, SD = 1:12 hrs). Squirrels  
124 were either blood sampled the same day as confirming they consumed their last treatment (n = 36, mean  
125 = 3:30 hrs, range = 0:57-8:55 hrs, referred to as '*same day bleeds*' hereafter) or the next day (n = 30,  
126 mean = 22:46 hrs, range = 14:57-30:55 hrs, referred to as '*next day bleeds*' hereafter. Note that for 19  
127 next day bleed squirrels, the time of treatment consumption was not recorded). Blood samples obtained  
128 within 3 min of squirrels entering a trap (n = 54) are referred to as *true baseline* samples (Romero et al.  
129 2005). If the first blood sample was obtained >3 min after squirrels went into traps (n = 12), this is  
130 referred to as *nominal baseline* samples.

131 Blood samples were obtained from the nailbed and collected into heparinized capillary tubes. To  
132 determine how exogenous cortisol affected the HPA axis, we used two different methods. We either 1)  
133 subjected squirrels to dexamethasone and adrenocorticotrophic hormone challenges (n = 32, hereafter  
134 referred to as DEX/ACTH challenges) following previously described protocols (Boonstra and McColl,  
135 2000), with modified concentrations of dexamethasone (3.2 mg/kg, hereafter, DEX) and  
136 adrenocorticotrophic hormone (4 IU/kg, hereafter ACTH), or 2) bled them at intervals of 0-3 min (samples  
137 shown as same day/next day: squirrel n = 23/11), 3-6 min (n = 14/6), 6-12 min (n = 15/7), and 18-22 min  
138 (n = 16/11, hereafter referred to as *timed bleeds*) to assess the response to handling stress.

139 Total plasma cortisol concentrations were assayed using an ImmuChem coated tube cortisol  
140 radio-immunoassay (MP Biomedicals, New York, USA) following the manufacturer's instructions, with  
141 the exception that, due to small sample volumes, plasma and tracer volumes of 12.5  $\mu$ L and 500  $\mu$ L were  
142 used. Linearity was tested by pooling several samples and serially diluting these from 1 (neat) to 1:64.

143 Results were plotted, visually inspected, and evaluated with linear regression ( $R^2$  adj = 0.991,  $p < 0.001$ ).  
144 According to the manufacturer, the assay detection limit is 1.7 ng/ml, and samples that read below this  
145 value ( $n = 8$ ) were set at 1.7 ng/ml. Most samples were run in duplicate, but because of small plasma  
146 volumes only one estimate was obtained for 33.9% of samples. Average standard and sample intra-assay  
147 CVs were 7.9% ( $n = 4$  assays). Inter-assay CVs for the five standards provided (10, 30, 100, 300 and 1000  
148 ng/ml cortisol) were 11.1%, 15.4%, 8.8%, 4.0% and 7.7%.

149 Corticosteroid binding capacity was measured in plasma stripped of endogenous steroids using  
150 dextran-coated charcoal (DCC) and diluted to a final dilution of 1/50 in phosphate buffered saline with  
151 0.1% gelatin (PBS). Three tubes (final volume of 150  $\mu$ L) were prepared for each sample: two containing  
152 160 nM cortisol (10% 1,2,6,7- $^3$ H-cortisol, Perkin Elmer, Waltham, MA, and 90% non-labeled cortisol, C-  
153 106, Sigma-Aldrich) to measure total binding, and one containing an additional 4  $\mu$ M non-labeled cortisol  
154 to measure nonspecific binding (primarily by albumin). After incubating tubes overnight, 300  $\mu$ L of ice-  
155 cold DCC was added and left for 15 minutes to strip free cortisol from the plasma mixture. The tubes  
156 were then centrifuged at 2000  $\times g$  at 4  $^{\circ}$ C for 12 minutes. The supernatant (containing bound cortisol)  
157 was decanted into scintillation vials, to which 4 mL of scintillation fluid (Emulsifier-Safe cocktail, Cat. No.  
158 6013389, Perkin Elmer, Groningen, Netherlands) was added. Vials were counted in a scintillation counter.  
159 Specific binding by CBG was calculated by subtracting nonspecific binding counts from total binding  
160 counts. Specific binding scintillation counts were converted to nM binding by measuring the total counts  
161 in the 150  $\mu$ L of the 160 nM solution and adjusting for the plasma dilution. Some CBG-bound hormone  
162 is lost to the DCC during the 15 minute DCC exposure. Using pooled plasma exposed to DCC for 5-20  
163 minutes, we calculated the rate of loss of CBG-bound cortisol (data not shown). From this, we calculated  
164 that the 15 minute DCC exposure resulted in the loss of 28.5% of CBG-bound hormone, and all our



165 specific binding measurements were corrected accordingly. To calculate the percent free cortisol, we  
166 estimated free cortisol concentrations (i.e. not bound by CBG) using the total cortisol concentration, the  
167 equilibrium dissociation constant for red squirrels of 61.1 nM (Delehanty et al., 2015), and the equation  
168 in Barsano and Baumann (1989). As plasma volumes were limited, only 58 samples could be assayed for  
169 both CBG/percent free cortisol and total cortisol.

### 170 *2.5 Effects of exogenous cortisol on squirrel body mass, litter survival, and adult survival*

171 Squirrels were trapped on average once per week (range 1-25 d) and weighed to the nearest 5g with a  
172 spring scale. We compared non-breeding squirrel mass in cortisol treated and control squirrels sampled  
173 in 2015 and 2016 before (range = 0-20 d, mean = 6 d, SD = 5 d) and during treatment (range = 1-33 days  
174 after treatments started, mean = 12 days, SD = 7). Because data on litter survival in 2015 and 2016 were  
175 limited, we also included data on litter fate collected in 2012 from squirrels fed the same dosages (0, 6,  
176 12 mg cortisol/day) for similar periods of time (see Dantzer et al., 2013). When females gave birth, their  
177 nests were located within a few days of parturition (first nest entry) and again when pups were ~25 d  
178 old (second nest entry) following McAdam et al. (2007). We examined how our treatments affected  
179 whether females treated during pregnancy (control n = 24, 6 mg cortisol/day n = 9, 8 mg cortisol/day n  
180 = 16, 12 mg cortisol/day n = 22) or lactation (control n = 8, 12 mg cortisol/day n = 9) lost their litters  
181 before the first nest entry or between the first and second nest entry, as determined by abdominal  
182 palpation. Females treated during pregnancy were treated from the estimated last third of pregnancy  
183 (based on abdominal palpation), until five days post parturition (treatment duration range = 8 – 25 days,  
184 mean = 18, SD = 4). Females treated during lactation were treated for 10 days, from days 5 to 15 post  
185 parturition, although due to human error and field conditions, one female was treated for 8, and another

186 for 11 days (range = 8 -11 days, mean = 10, SD = 0.6). Adult squirrel survival was monitored through  
187 regular live trapping and behavioral observations (McAdam et al., 2007). Survival data were only  
188 available from squirrels studied in 2015 (n = 50, including 41 females and nine males). These squirrels  
189 were fed either control treatments (n = 25, 10 – 26 days, mean = 19, SD = 7) or 12 mg cortisol/day (n =  
190 25, 8 -35 days, mean = 20, SD = 7). Although we did not know the ages of all squirrels, there was no age  
191 bias between squirrels fed control (eight known ages, mean = 4.05, SD= 1.05 years) and those fed cortisol  
192 (nine known ages, mean = 3.97, SD = 0.87 years,  $t_{13,8} = 0.18$ ,  $p = 0.86$ ). We estimated survival until exactly  
193 1 year after the treatments were stopped.

#### 194 *2.6 Statistical analyses*

195 Analyses were conducted using R statistical software (v 3.3.3, R Core Team, 2017). Where there  
196 were multiple measures for individual squirrels, linear mixed-effects models (LMMs) were conducted  
197 using packages ‘lme4’ (v 1.1.10, Bates et al., 2015) and all such models contained ‘squirrel ID’ as a random  
198 intercept term. If there were no repeated measures, general linear models (GLM) were used. To make  
199 comparisons between groups, we used the ‘glht’ function in R package ‘multcomp’ (Hothorn et al., 2017).  
200 Model residuals were plotted to check for conformity with homogeneity of variance and normality (Zuur  
201 et al., 2010). Where necessary, data were ln transformed. Regression lines were visualized using R  
202 package ‘visreg’ (v 2.2.2, Breheny and Burchett, 2016).

203 We tested effects of treatments on FGM concentrations using LMMs, analyzing female and male  
204 data separately due to differences in reproductive states. Models for females included dose (0, 6, 8, 12  
205 mg of cortisol/day), reproductive state (non-breeding, pregnant, lactating), Julian date, and whether the  
206 squirrel was treated on the sampling day (yes/no) as fixed effects, with an interaction term for dose and

207 treatment (yes/no). Models for males included the same variables (but only doses of 0 and 8 mg) except  
208 reproductive state (all were non-breeding). To test for lasting effects of treatments on FGM, we analyzed  
209 samples collected between 1-21 d after treatments stopped. We included an interaction between dose  
210 and days after treatments ended in an LMM, as above.

211           Regarding blood sample collection, there was no daytime sampling bias between cortisol  
212 treated (between 9:41 and 18:07, mean = 13:23) and control squirrels (between 9:33 and 17:31, mean  
213 = 13:50, t-test,  $t_{42.15} = 1.14$ ,  $p = 0.26$ ), and no effect of sampling time on plasma cortisol (linear regression,  
214  $b = 0.008$ ,  $t_{0.07} = 0.11$ ,  $p = 0.91$ ), indicating that there were no effects of circadian patterns in our dataset.

215           Squirrels were either subjected to DEX/ACTH challenges, or squirrels were subjected to timed  
216 bleeds (and blood samples were collected between 2 and 28 minutes after trap doors closed). LMMs  
217 were run separately for DEX/ACTH challenges and timed bleeds. Models included fixed effects for  
218 treatment and bleed time. For DEX/ACTH challenges bleed times included the categorical variables ‘true  
219 baseline’, ‘nominal baseline’, ‘60 minutes after DEX injection’ (hereafter; DEX), ‘30 minutes after ACTH  
220 injection’ (hereafter; ACTH30), and ‘60 minutes after ACTH injection’ (hereafter; ACTH60); for timed  
221 bleeds, bleed times were expressed as minutes since the squirrel was trapped (continuous variable,  
222 standardized following Schielzeth, 2010). Two plasma samples with very low binding (<10%) were  
223 excluded from the analysis. Some models included squirrels treated for either 1 or 2 weeks, and some  
224 included squirrels that were treated in both spring and autumn. Where this was the case, treatment  
225 duration (1/2 weeks) and whether or not squirrels had been treated before (yes/no) was included in the  
226 models. However, these variables were not significant in any of the models, and are not discussed further.

227 To assess effects of treatments on CBG concentrations and percent free cortisol, we subset  
228 samples into those from DEX/ACTH challenges conducted the same day as consumption of the last  
229 treatment (n = 16) and those collected the next day (n = 27), and timed bleeds. Due to limited data (only  
230 58 samples were analyzed for CBG, across all categories), only the effects of treatment (control or 8 mg  
231 cortisol/day) on CBG and percent free cortisol were tested for squirrels DEX/ACTH challenged on the  
232 same day as consuming their last treatments. Models for squirrels ACTH challenged the day after  
233 consuming their last treatments included interactions between sample time (nominal baseline, DEX,  
234 ACTH30, ACTH60) and treatment (control or 8 mg cortisol/day). For timed bleeds, data from samples  
235 collected on the same day (n = 12) and the day after (n = 3) the last treatment was consumed were  
236 pooled. Models included an interaction between the sampling day (same/next) and treatment (control  
237 or 8 mg cortisol/day).

238 To estimate the total plasma cortisol in a 24 h period, true baseline cortisol was plotted against  
239 the time since treatment was consumed. Regression line equations were used to calculate the area  
240 under these lines for both control and cortisol treated squirrels, using the 'trapzfun' command in package  
241 'pracma' (Borchers, 2018), and areas under the curve were compared with  $\chi^2$  tests.

242 Data on body mass were subset into those collected in spring (females fed 0 or 12 mg cortisol/day)  
243 and autumn (males fed 0 or 8 mg cortisol/day). Body masses were compared using LMMs including a  
244 two-way interaction between treatment, and time (before/during treatment). To assess differences  
245 between litter survival (lost/not lost), and adult survival (yes/no) GLMs were applied using binomial  
246 errors. Models included treatment (12 mg cortisol/day or control) and sex. Dispersion parameters (using  
247 R package blemco, Korner-Nievergelt et al., 2015) between 0.75 and 1.4 were taken to accept  
248 overdispersion was not problematic.

249

### 250 **3. Results**

#### 251 *3.1 Effects of treatments on fecal glucocorticoid metabolite concentrations*

252 Overall, squirrels fed cortisol treatments (6, 8, 12 mg/day) had significantly higher FGM  
253 concentrations than when they were not being fed ( $F_{3,263.8} = 11.5$ ,  $p < 0.001$ , Fig. 1), but the magnitude  
254 of increase depended on the dosage. Squirrels fed plain peanut butter with no cortisol did not have  
255 higher FGM concentrations when they were being fed their treatments compared to when they were  
256 not being fed their treatments (females:  $b = -0.03$ ,  $SE = 0.15$ ,  $z = 0.22$ ,  $p = 1.0$ ; males:  $b = 0.14$ ,  $SE = 0.36$ ,  
257  $z = 0.41$ ,  $p = 0.96$ ). FGM concentrations in squirrels fed 6, 8, or 12 mg cortisol/day in both females and  
258 males were significantly higher compared when they were being fed compared to when they were not  
259 being fed (6 mg:  $b = 0.78$ ,  $SE = 0.28$ ,  $z = 2.8$ ,  $p = 0.032$ ; 8 mg: females:  $b = 0.79$ ,  $SE = 0.21$ ,  $z = 3.9$ ,  $p <$   
260  $0.001$ ; males:  $b = 1.37$ ,  $SE = 0.49$ ,  $z = 2.82$ ,  $p = 0.013$ ; 12 mg:  $b = 1.39$ ,  $SE = 0.17$ ,  $z = 8.0$ ,  $p < 0.001$ ).  
261 Concentrations of FGM during treatment in female squirrels treated with 12 mg vs 8 mg ( $b = 0.39$ ,  $SE =$   
262  $0.28$ ,  $z = 1.4$ ,  $p = 0.63$ ), 6 mg vs 8 mg ( $b = 0.36$ ,  $SE = 0.36$ ,  $z = 1.0$ ,  $p = 0.88$ ), and 6 mg vs 12 mg cortisol/day  
263 ( $b = 0.74$ ,  $SE = 0.35$ ,  $z = 2.1$ ,  $p = 0.18$ ) were not significantly different. Julian date did not affect FGM  
264 concentrations in females ( $F_{1,284.9} = 3.44$ ,  $p = 0.06$ ) or males ( $F_{1,15.2} = 0.73$ ,  $p = 0.41$ ). Reproductive  
265 condition did not affect FGM in this dataset, possibly because of limited sample numbers on some  
266 reproductive states (see Table 1,  $F_{2,105.0} = 1.37$ ,  $p = 0.26$ ).

267 There was little evidence that the GC treatments had a lasting influence on FGM concentrations  
268 in squirrels. FGM concentrations in control females ( $b = -0.03$ ,  $SE = 0.03$ ,  $t = -1.16$ ,  $DF = 53.9$ ,  $p = 0.25$ )  
269 and males ( $b = -0.25$ ,  $SE = 0.16$ ,  $t = -1.61$ ,  $DF = 8.4$ ,  $p = 0.14$ ) did not change in the 1-21 days after  
270 treatments stopped, nor did FGM concentrations from females ( $b = -0.01$ ,  $SE = 0.04$ ,  $t = 1.48$ ,  $DF = 53.3$ ,

271  $p = 0.14$ ) and males ( $b = 0.19$ ,  $SE = 0.16$ ,  $t = 1.2$ ,  $DF = 8.4$ ,  $p = 0.26$ ) treated with 8 mg cortisol/day (although  
272 sample sizes from males were small). FGM concentrations in females treated with 6 mg cortisol/day also  
273 did not significantly change in the 1-21 days after treatments stopped ( $b = -0.01$ ,  $SE = 0.06$ ,  $t = -0.21$ ,  $DF$   
274  $= 53.9$ ,  $p = 0.14$ ), but FGM concentrations in females treated with 12 mg of cortisol/day significantly  
275 increased after treatments stopped ( $b = 0.08$ ,  $SE = 0.04$ ,  $t = 2.31$ ,  $DF = 49.8$ ,  $p = 0.02$ , Fig. 2).

### 276 *3.2 Squirrels DEX/ACTH challenged the same day as consuming their last treatment*

277 Squirrels treated with cortisol (8 mg/d) that were DEX/ACTH challenged the same day as  
278 consuming their last treatment had a significantly different response to DEX and ACTH compared to  
279 control squirrels DEX/ACTH challenged the same day as consuming their last treatment ( $F_{9,29.8} = 6.4$ ,  $p <$   
280  $0.001$ ). Squirrels treated with cortisol (8 mg/day) had significantly higher true baseline cortisol  
281 concentrations ( $611.4 \pm 104.4$  ng/ml) than control squirrels ( $214.5 \pm 41.3$  ng/ml,  $b = 394.7$ ,  $SE = 88.7$ ,  $z =$   
282  $4.4$ ,  $p < 0.001$ , Fig. 3A). Both cortisol treated ( $205.8 \pm 50.2$  ng/ml) and control ( $292.2 \pm 44.5$  ng/ml) squirrels  
283 responded to DEX, as indicated by the reductions in their plasma cortisol concentrations 60 min after  
284 the DEX injection, although this effect was not significant (control:  $b = -33.9$ ,  $SE = 81.2$ ,  $z = -0.44$ ,  $p = 1.0$ ;  
285 cortisol treated:  $b = -139.6$ ,  $SE = 88.7$ ,  $z = -1.57$ ,  $p = 0.62$ ). Control squirrels had significantly higher plasma  
286 cortisol concentrations in samples taken 30 minutes after ACTH injection ( $604.9 \pm 93.6$  ng/ml,  $b = 321.1$ ,  
287  $SE = 81.2$ ,  $z = 3.97$ ,  $p < 0.001$ ), although concentrations started to decrease again 60 min after ACTH  
288 injection ( $404.6 \pm 76.3$  ng/ml,  $b = -213.4$ ,  $SE = 85.1$ ,  $z = -2.51$ ,  $p = 0.10$ ). However, in cortisol treated  
289 squirrels, plasma cortisol concentrations decreased 30 minutes after ACTH injection ( $153.5 \pm 22.1$  ng/ml,  
290  $b = -51.8$ ,  $SE = 88.7$ ,  $z = -0.58$ ,  $p = 1.0$ ), and increased slightly 60 minutes after ACTH injection ( $163.1 \pm 36.7$   
291 ng/ml,  $b = 9.5$ ,  $SE = 83.5$ ,  $z = 0.11$ ,  $p = 1.0$ ), although these effects were non-significant.

292 *3.3 Squirrels DEX/ACTH challenged the day after consuming their last treatment*

293 Squirrels treated with cortisol (8 mg/d) that were DEX/ACTH challenged the day after  
294 consuming their last treatment had a significantly different response to DEX and ACTH compared to  
295 control squirrels DEX/ACTH challenged the same day as consuming their treatment ( $F_{4,46.5} = 9.2$ ,  $p <$   
296  $0.001$ ). Cortisol treated squirrels that were sampled the day after consuming their last treatment had  
297 lower plasma cortisol concentrations than controls at all sampling times. Nominal baseline plasma  
298 cortisol concentrations ( $35.9 \pm 21.2$  ng/ml) were on average 92.3% lower in cortisol treated squirrels than  
299 in control squirrels ( $468.5 \pm 34.8$  ng/ml,  $b = -404.8$ ,  $SE = 67.4$ ,  $z = -6.0$ ,  $p < 0.001$ , Fig. 3B). Plasma cortisol  
300 concentrations after the DEX injection were also lower in cortisol treated squirrels ( $56.5 \pm 34.6$  ng/ml)  
301 than controls ( $239.8 \pm 24.8$  ng/ml, a 76.4% difference,  $b = -183.3$ ,  $SE = 53.7$ ,  $z = -3.4$ ,  $p = 0.006$ ). Thirty  
302 minutes after the ACTH injection, cortisol treated squirrels (mean =  $97.9 \pm 19.9$  ng/ml) had plasma cortisol  
303 concentrations that were on average 80.4% lower than in control squirrels (mean =  $498.8 \pm 34.6$  ng/ml,  $b$   
304 =  $398.1$ ,  $SE = 57.5$ ,  $z = -6.9$ ,  $p < 0.001$ ). This difference remained 60 min after the ACTH injection (cortisol  
305 mean =  $101.7 \pm 11.4$  ng/ml, control mean =  $469.0 \pm 89.2$  ng/ml, a difference of 78.3%,  $b = -368.2$ ,  $SE = 56.8$ ,  
306  $z = -6.5$ ,  $p < 0.001$ , Fig. 3B).

307 In squirrels sampled the day after receiving their last treatment, control squirrels ( $b = -211.9$ ,  
308  $SE = 53.7$ ,  $z = -3.9$ ,  $p < 0.001$ ), but not cortisol treated squirrels ( $b = 9.6$ ,  $SE = 49.4$ ,  $z = 0.2$ ,  $p = 1.0$ ), had  
309 significantly lower plasma cortisol concentrations 60 minutes after DEX injections compared to nominal  
310 baselines. Thirty minutes after the ACTH injection (ACTH30), control squirrels ( $b = 257.3$ ,  $SE = 45.6$ ,  $z =$   
311  $5.6$ ,  $p < 0.001$ ), had significantly higher plasma cortisol concentrations than 60 minutes after DEX  
312 injections. In cortisol treated squirrels, plasma cortisol concentrations were higher at 30 minutes after

313 ACTH injection (ACTH30) than 60 minutes after DEX injection, but this was not significant ( $b = 42.6$ ,  $SE =$   
314  $44.7$ ,  $z = 0.95$ ,  $p = 0.95$ , Fig. 3B).

### 315 *3.4 Effects of treatments on stress response to capture and handling*

316 Squirrels were bled at intervals of 0-3, 3-6, 6-12 and 18-22 min after trap doors closed (timed  
317 bleeds) either the same day as confirming they ate their last treatment (mean time elapsed = 3:36 hrs,  
318 range = 0:57-8:55 hrs, cortisol  $n = 10$ , control  $n = 13$ ) or the next day (mean time elapsed = 22:46, hrs  
319 range = 14:57-30:55 hrs, cortisol  $n = 5$ , control  $n = 6$ ). Treatment (cortisol or control) affected how  
320 handling stress affected squirrel plasma cortisol concentrations in squirrels bled on the same day as  
321 consuming their last treatment. Plasma cortisol concentrations were generally higher in cortisol treated  
322 squirrels, but concentrations decreased as time since the squirrel went in the trap increased ( $b = -0.56$ ,  
323  $SE = 0.17$ ,  $t = 3.4$ ,  $DF = 62.3$   $p = 0.001$ ). In control squirrels, on the other hand, plasma cortisol  
324 concentrations increased as time since the squirrel went in the trap increased ( $b = 0.31$ ,  $SE = 0.11$ ,  $t = 2.9$ ,  
325  $DF = 62.5$ ,  $p = 0.006$ , Fig. 4A).

326 Plasma cortisol concentrations were generally lower in cortisol treated squirrels that were bled  
327 the day after consuming their last treatment than in control squirrels ( $b = -1.8$ ,  $SE = 0.81$ ,  $t = -2.2$ ,  $DF =$   
328  $8.4$ ,  $p = 0.057$ ). Handling time generally increased plasma cortisol concentrations ( $b = 0.42$ ,  $SE = 0.20$ ,  $t =$   
329  $2.1$ ,  $DF = 19.2$ ,  $p = 0.048$ ), and this was not affected by treatment ( $b = 0.40$ ,  $SE = 0.1.4$ ,  $DF = 18.7$ ,  $p = 0.16$ ).

330 The time since squirrels consumed their last treatments significantly affected true baseline  
331 plasma cortisol in cortisol treated squirrels ( $b = -0.27$ ,  $SE = 0.04$ ,  $t = -6.1$ ,  $p < 0.001$ ) but not controls ( $b =$   
332  $-0.02$ ,  $SE = 0.03$ ,  $t = -0.58$ ,  $p = 0.57$ , Fig. 5). Plasma cortisol increased after squirrels consumed their  
333 cortisol treatments, but declined with time post-consumption, until, ~20 hours post-consumption,  
334 plasma cortisol was much lower in cortisol fed than in control squirrels (Fig. 5). Overall, squirrels fed



335 cortisol experienced significantly higher plasma cortisol (total area = 7907.4 units) than controls (total  
336 area = 4110.8 units,  $\chi=614.4$ , DF = 1,  $p < 0.001$ , Fig. 5) in a 24 h period.

### 337 *3.5 Effects of treatments on CBG*

338 Cortisol treatment significantly lowered CBG concentrations in squirrels DEX/ACTH challenged  
339 on the same day as consuming their last treatments ( $F_{1,5.0} = 51.0$ ,  $p < 0.001$ , Fig. 6A). Cortisol treatment  
340 also significantly lowered CBG concentrations in squirrels DEX/ACTH challenged the day after consuming  
341 their last treatment ( $F_{1,12.9} = 29.3$ ,  $p < 0.001$ ). Consequently, cortisol treatment significantly increased the  
342 proportion of free cortisol in plasma in squirrels DEX/ACTH challenged on the same day ( $F_{1,5.0} = 7.6$ ,  $p =$   
343  $0.04$ ) and the day after consuming their last treatments ( $F_{1,12.1} = 15.3$ ,  $p = 0.002$ , Fig. 6B). Treatment did  
344 not affect plasma CBG concentrations at different sample times (nominal baseline, DEX, ACTH30,  
345 ACTH60) in squirrels sampled the day after consuming their last treatment ( $F_{3,6.2} = 1.0$ ,  $p = 0.46$ ), nor  
346 percent free cortisol ( $F_{3,12.3} = 0.5$ ,  $p = 0.71$ ). Cortisol treatment also lowered CBG concentrations in  
347 squirrels subjected to timed bleeds ( $F_{1,7.0} = 24.5$ ,  $p = 0.002$ , Fig. 6A), and increased percent free cortisol  
348 ( $F_{7,0} = 2.3$ ,  $p = 0.17$ ). The effect of treatment on plasma CBG concentrations ( $F_{7,0} = 1.3$ ,  $p = 0.30$ ) and  
349 percent free cortisol ( $F_{1,7.0} = 1.9$ ,  $p = 0.21$ ) was not different between squirrels sampled the same day or  
350 the day after last treatment.

### 351 *3.6 Effects of treatments on body mass*

352 There was no effect of the interaction between treatment (control or 12 mg cortisol/day) and  
353 time of sampling (during treatment yes/no) on masses of control females ( $n = 24$  before,  $n = 23$  during  
354 treatment records) and females fed 12 mg cortisol/day ( $n = 30$  before,  $n = 31$  during treatment records,  
355  $b = -3.9$ ,  $SE = 4.9$ ,  $t_{87.9} = -0.79$ ,  $p = 0.43$ ). There was also no effect of the interaction between treatment  
356 and time of sampling on masses of males fed 8 mg cortisol/day ( $n = 17$  before,  $n = 11$  during treatment

357 records) and males fed control treatments ( $n = 20$  before,  $n = 17$  during treatment records,  $b = 6.9$ ,  $SE =$   
358  $4.8$ ,  $t_{29.3} = 1.4$ ,  $p = 0.16$ ).

### 359 *3.7 Effects of treatments on litter survival*

360 There was no significant difference in litter survival rates before the first nest entry between  
361 females treated with cortisol during pregnancy (14/47 lost) and controls (7/24 lost;  $z_{0.55} = 0.13$ ,  $p = 0.89$ ).  
362 When dosages (0, 6, 8, 12 mg/day) were analyzed separately, there also was no evidence of any dosage  
363 significantly affecting litter survival prior to the first nest entry (6 mg:  $z_{0.81} = -1.4$ ,  $p = 0.17$ ; 8 mg;  $z_{0.78} =$   
364  $0.74$ ,  $p = 0.46$ ; 12 mg:  $z_{0.68} = 0.50$ ,  $p = 0.62$ ).

365 There were also no significant differences in litter survival between the first and second nest  
366 entry between females treated with cortisol during pregnancy (17/47) and controls (4/24:  $z_{0.55} = -0.05$ ,  $p$   
367  $= 0.96$ ). There was no evidence of dosages of 6, 8, or 12 mg/day significantly affecting litter survival  
368 between the first and second nest entries (6 mg:  $z_{0.81} = -1.38$ ,  $p = 0.17$ ; 8 mg:  $z_{0.73} = 0.29$ ,  $p = 0.77$ , 12 mg:  
369  $z_{0.68} = 0.50$ ,  $p = 0.62$ ).

370 For females treated during lactation ( $n = 17$ ), there was no significant difference in litter survival  
371 between the first and second nest entry, with 1/8 control females losing their litter and 3/9 cortisol fed  
372 (12 mg/day) females losing their litter ( $z_{1.3} = -0.98$ ,  $p = 0.33$ ).

### 373 *3.8 Effects of treatments on adult survival*

374 There was no difference in survival to one year following cessation of the treatments between  
375 controls (18/25 survived to one year) and those fed cortisol (14/25 survived to one year;  $z_{0.6} = -1.13$ ,  $p =$   
376  $0.26$ ). There was no difference in survival between males (7/9 survived to one year), and females (25/41  
377 survived to one year,  $z_{0.9} = 0.89$ ,  $p = 0.37$ ).

378

#### 379 **4. Discussion**

380 Our results on cortisol manipulations in wild red squirrels, spanning a range of dosages, life  
381 history stages, and including both sexes, provide important information regarding the response of wild  
382 animals to such hormone manipulation. Squirrels treated with cortisol had higher FGM concentrations  
383 and plasma cortisol concentrations over a 24 h period. However, our results highlight that exogenous  
384 GCs can cause the adrenals to stop responding to handling stress or pharmaceutical (DEX/ACTH)  
385 challenges, although these effects were short-lived and did not affect fitness proxies, including body  
386 mass, and offspring or adult survival.

387 Concentrations of CBG were significantly reduced in squirrels treated with cortisol for one or  
388 two weeks, suggesting that chronically elevated GCs reduce CBG concentrations. This reduction in CBG  
389 is likely to result in a higher bioavailability of plasma cortisol (Breuner et al., 2013). Studies in rats have  
390 shown that administration of exogenous GCs can inhibit the rate of CBG production and secretion in the  
391 liver (Feldman et al., 1979), and one study found that, 24 hours after acute stress, CBG concentrations  
392 were reduced in rats (Fleshner et al., 1995). Chronic stress has also been shown to lead to reduced CBG  
393 concentrations in most species studied to date (Armario et al., 1994; Breuner et al., 2013). A previous  
394 study found that CBG concentrations in red squirrel plasma (which were initially high) started to decrease  
395 as quickly as four hours after the start of DEX/ACTH challenges, suggesting that although high  
396 concentrations of CBG may buffer squirrels from the effects of high concentrations of free cortisol  
397 caused by acute stressors, these concentrations decline rapidly when the duration of the stressor is  
398 longer than a few hours (Boonstra and McColl, 2000). However, this does not seem to carry any  
399 noticeable cost as there were no changes in body mass or litter and adult survival in response to our  
400 treatments.

401 Previous reviews have emphasized the importance of maintaining hormone concentrations  
402 within a physiological range when performing hormone manipulations (Crossin et al., 2016; Fusani, 2008;  
403 Zera, 2007). Studies in mammals have shown that acute experimental challenges can cause increases in  
404 plasma cortisol that are comparable to those achieved by our treatments. For example, in both  
405 laboratory rats and wild animals, physical restraint, open field trials, and maze tests may cause >10 fold  
406 increases in plasma glucocorticoid concentrations (Cockrem, 2013). In control squirrels, plasma cortisol  
407 concentrations increased up to 10.4 fold from true baseline concentrations in timed bleeds, indicating  
408 that plasma cortisol could increase by this much without chemical stimulation. In this study, the highest  
409 recorded true baseline plasma cortisol concentration in cortisol treated squirrels was approximately  
410 seven times higher than the average control true baseline plasma cortisol concentration. This suggests  
411 that the increase in plasma cortisol caused by our 8 mg cortisol/day treatment is within the physiological  
412 range for a squirrel. However, it is possible that the duration of elevated plasma cortisol caused by our  
413 treatments is longer than that caused by natural stressors. Studies in rats show that plasma  
414 glucocorticoids increase quickly in response to acute stress, but returns to baseline concentrations  
415 within 2-5 hours after the stressor is removed (Marin et al., 2007; Mizoguchi et al., 2001), but in cortisol  
416 treated squirrels, plasma cortisol remained elevated, compared to control squirrels, for an estimated 17  
417 hours post-treatment.

418 Our results highlight the importance of regularly provisioning individuals with treatments to  
419 sustain increases in hormone concentrations. Although we did find that squirrels fed cortisol had  
420 significantly higher concentrations of plasma cortisol over a 24 hr period than the controls, it was  
421 important to provision individuals with the treatments every 24 hrs. This was because plasma cortisol in  
422 cortisol treated squirrels did decrease to concentrations well below those of control squirrels >20 hrs

423 after consuming their treatments. When it is feasible, daily supplementation may be effective in  
424 maintaining sustained elevations in hormone concentrations and provide an alternative to other  
425 methods like implants that carry some disadvantages (Sopinka et al., 2015).

426 Our results also highlight the potentially adverse consequences that may occur when ending  
427 hormone manipulations in wild animals. When sampled less than a day after the end of cortisol  
428 treatment, squirrels did not respond to handling stress or ACTH injection, and appeared to have impaired  
429 adrenal function and lower CBG concentrations. Data collected from cortisol treated squirrels the day  
430 after consuming their last treatment showed that plasma cortisol was very low compared to control  
431 squirrels, suggesting exogenous GCs have been excreted but endogenous GCs were being produced at a  
432 lower rate than in control animals. However, plasma cortisol did increase with handling stress, suggesting  
433 some recovery of adrenal function within 24 hrs of stopping the treatments. Data on FGM collected  
434 between 0-21 d after treatments were stopped suggest that in squirrels fed 6 or 8 mg cortisol/day there  
435 were no longer-term treatment effects, although squirrels fed 12 mg/day showed increases in FGM in  
436 the 21 d following the end of treatment. Our results suggest that the adrenal gland may need time to  
437 recover from treatment, and endogenous cortisol production may not return to pre-treatment levels for  
438 several days.

439 Hormone manipulations can provide powerful tools to study relationships between hormones  
440 and life history traits, and in recent years methods have been developed to achieve this (Sopinka et al.,  
441 2015). Many studies aim to experimentally elevate GCs to test the “cort-fitness hypothesis”, which  
442 proposes that elevations in baseline GCs decreases survival or reproduction (Bonier et al., 2009). We  
443 show that elevation of plasma cortisol concentrations within the physiological range for 1-2 weeks had  
444 profound effects on measures of HPA axis reactivity and CBG concentrations. Despite these shifts in the

445 functionality of the neuroendocrine stress axis and the sustained elevations in GCs, we found no change  
446 in body mass or offspring and adult survival. This indicates that some species can tolerate bouts of  
447 increased GCs and rapid reorganization of the stress axis without negatively impacting survival and  
448 reproduction.

449

#### 450 **Acknowledgements**

451 We thank Agnes MacDonald and her family, and the Champagne and Aishihik First Nations for allowing  
452 us to conduct our work on their land. We would like to thank Dr. A Hämäläinen, D. Fisher, J. Steketee,  
453 C. Hoffmann, M. Sehrsweeny and Z. Fogel for assistance in the field, as well as all the volunteers, field  
454 assistants, and graduate students who make the KRSP possible. We have no conflicts of interest. This is  
455 KRSP paper number XX. Funding for this study was provided by the Natural Sciences and Engineering  
456 Research Council of Canada (to R.B., J.E.L., and A.G.M.), National Science Foundation (B.D.), and the  
457 University of Michigan (B.D.). Data will be archived at Data Dryad.

458

459 **References**

- 460 Arabi, Y.M., Aljumah, A., Dabbagh, O., Tamim, H.M., Rishu, A.H., Al-Abdulkareem, A., Al Knawy, B.,  
461 Hajeer, A.H., Tamimi, W., Cherfan, A., 2010. Low-dose hydrocortisone in patients with cirrhosis  
462 and septic shock: A randomized controlled trial. *Can. Med. Assoc. J.* 182, 1971–1977.  
463 doi:10.1503/cmaj.090707
- 464 Arlt, W., Allolio, B., 2003. Adrenal insufficiency. *Lancet* 361, 1881–1893. doi:10.1016/S0140-  
465 6736(03)13492-7
- 466 Armario, A., Giralt, M., Martí, O., Gavaldà, A., Hidalgo, J., Hsu, B.R., Kuhn, R.W., 1994. The effect of  
467 acute and chronic ACTH administration on pituitary-adrenal response to acute immobilization  
468 stress. Relationship to changes in corticosteroid-binding globulin. *Endocr. Res.* 20, 139–149.
- 469 Axelrod, L., 1976. Glucocorticoid therapy. *Medicine (Baltimore)*. 55, 39–65.
- 470 Barsano, C.P., Baumann, G., 1989. Simple algebraic and graphic methods for the apportionment of  
471 hormone (and receptor) into bound and free fractions in binding equilibria; or how to calculate  
472 bound and free hormone? *Endocrinology* 124, 1101–1106.
- 473 Bates, D., Maechler, M., Bolker, B., Walker, S., Christensen, R.H., Singmann, H., Dai, B., Grothendieck,  
474 G., Green, P., 2015. Package “lme4.”
- 475 Bonier, F., Martin, P.R., Moore, I.T., Wingfield, J.C., 2009. Do baseline glucocorticoids predict fitness?  
476 *Trends Ecol. Evol.* 24, 634–642. doi:10.1016/j.tree.2009.04.013
- 477 Boonstra, R., McColl, C.J., 2000. Contrasting stress response of male Arctic ground squirrels and red

- 478 squirrels. *J. Exp. Zool. Part A Ecol. Genet. Physiol.* 286, 390–404.
- 479 Borchers, H., 2018. Package “pracma.” doi:<https://cran.r-project.org/package=pracma>
- 480 Boutin, S., Wauters, L.A., McAdam, A.G., Humphries, M.M., Tosi, G., Dhondt, A.A., 2006. Anticipatory  
481 reproduction and population growth in seed predators. *Science* (80-. ). 314, 1928–1930.  
482 doi:10.1126/science.1135520
- 483 Breheny, P., Burchett, W., 2016. Package “visreg.” doi:[https://cran.r-](https://cran.r-project.org/web/packages/visreg/vis)  
484 [project.org/web/packages/visreg/vis](https://cran.r-project.org/web/packages/visreg/vis)
- 485 Breuner, C.W., Delehanty, B., Boonstra, R., 2013. Evaluating stress in natural populations of  
486 vertebrates: total CORT is not good enough. *Funct. Ecol.* 27, 24–36. doi:10.1111/1365-2435.12016
- 487 Breuner, C.W., Patterson, S., Hahn, T., 2008. In search of relationships between the acute  
488 adrenocortical response and fitness. *Gen. Comp. Endocrinol.* 157, 288–95.
- 489 Broide, J., Soferman, R., Kivity, S., Golander, A., Dickstein, G., Spirer, Z., Weisman, Y., 1995. Low-dose  
490 adrenocorticotropin test reveals impaired adrenal function in patients taking inhaled  
491 corticosteroids. *J. Clin. Endocrinol. Metab.* 80, 1243–1246. doi:10.1210/jcem.80.4.7714095
- 492 Casolinia, P., Cigliana, G., Alemaa, G., Ruggieria, V., Angeluccia, L., Catalania, A., 1997. Effect of  
493 increased maternal corticosterone during lactation on hippocampal corticosteroid receptors,  
494 stress response and learning in offspring in the early stages of life. *Neuroscience* 79, 1005–1012.
- 495 Catalani, A., Casolini, P., Ciglianab, G., Scaccianoce, S., Consoli, C., Cincque, C., Zuena, A., Angelucci, L.,  
496 2002. Maternal corticosterone influences behavior, stress response and corticosteroid receptors



- 497 in the female rat. *Pharmacol. Biochem. Behav.* 73, 105–114.
- 498 Cockrem, J.F., 2013. Individual variation in glucocorticoid stress responses in animals. *Gen. Comp.*  
499 *Endocrinol.* 181, 45–58. doi:10.1016/j.ygcen.2012.11.025
- 500 Crossin, G.T., Love, O.P., Cooke, S.J., Williams, T.D., 2016. Glucocorticoid manipulations in free-living  
501 animals: Considerations of dose delivery, life-history context and reproductive state. *Funct. Ecol.*  
502 30, 116–125. doi:10.1111/1365-2435.12482
- 503 Dantzer, B., McAdam, A.G., Palme, R., Boutin, S., Boonstra, R., 2011. How does diet affect fecal steroid  
504 hormone metabolite concentrations? An experimental examination in red squirrels. *Gen. Comp.*  
505 *Endocrinol.* 174, 124–131. doi:10.1016/j.ygcen.2011.08.010
- 506 Dantzer, B., Mcadam, A.G., Palme, R., Fletcher, Q.E., Boutin, S., Humphries, M.M., Boonstra, R., 2010.  
507 Fecal cortisol metabolite levels in free-ranging North American red squirrels: Assay validation and  
508 the effects of reproductive condition. *Gen. Comp. Endocrinol.* 167, 279–286.  
509 doi:10.1016/j.ygcen.2010.03.024
- 510 Dantzer, B., Newman, A.E.M., Boonstra, R., Palme, R., Boutin, S., Humphries, M.M., Mcadam, A.G.,  
511 2013. Density triggers maternal hormones that increase adaptive offspring growth in a wild  
512 mammal. *Science (80-. )*. 340, 1215–1217. doi:10.1126/science.1235765
- 513 Dantzer, B., Westrick, S.E., van Kesteren, F., 2016. Relationships between endocrine traits and life  
514 histories in wild animals: insights, problems, and potential pitfalls. *Integr. Comp. Biol.* 56, 185–  
515 197. doi:10.1093/icb/icw051
- 516 De Nardo, D.F., Sinervo, B., 1994. Effects of corticosterone on activity and home-range size of free-

- 517 ranging male lizards. *Horm. Behav.* 28, 53–65. doi:10.1006/hbeh.1994.1005
- 518 Delehanty, B., Hossain, S., Jen, C.C., Crawshaw, G.J., Boonstra, R., 2015. Measurement of free  
519 glucocorticoids: quantifying corticosteroid-binding globulin binding affinity and its variation within  
520 and among mammalian species. *Conserv. Physiol.* 3, 1–13.
- 521 Ebensperger, L.A., Ramírez-Estrada, J., León, C., Castro, R.A., Tolhuysen, L.O., Sobrero, R., Quirici, V.,  
522 Burger, J.M., Soto-Gamboa, M., Hayes, L.D., 2011. Sociality, glucocorticoids and direct fitness in  
523 the communally rearing rodent, *Octodon degus*. *Horm. Behav.* 60, 346–352.  
524 doi:10.1016/j.yhbeh.2011.07.002
- 525 Feiwel, M., James, V.H., Barnett, E., 1969. Effect of potent topical steroids on plasma cortisol levels of  
526 infants and children with eczema. *Lancet* 293, 485–487. doi:10.1016/S0140-6736(69)91588-8
- 527 Feldman, D., Mondon, C., Horner, J., Weiser, J.N., 1979. Glucocorticoid and estrogen regulation of  
528 corticosteroid-binding globulin production by rat liver. *Am. J. Physiol. - Endocrinol. Metab.* 237,  
529 493–499.
- 530 Fleshner, M., Deak, T., Spencer, R.L., Laudenslager, M.L., Watkins, L.R., Maier, S., 1995. A long-term  
531 increase in basal levels of corticosterone and a decrease in corticosteroid-binding globulin after  
532 acute stressor exposure. *Endocrinology* 136, 5336–5342.
- 533 Fusani, L., 2008. Endocrinology in field studies: Problems and solutions for the experimental design.  
534 *Gen. Comp. Endocrinol.* 157, 249–253. doi:10.1016/j.ygcen.2008.04.016
- 535 Hothorn, T., Bretz, F., Westfall, P., Heiberger, R., Schuetzenmeister, A., Scheibe, S., 2017. Package  
536 “multcomp.” doi:<https://cran.r-project.org/package=multcomp>

- 537 Jacobs, S., Pullan, P., Potter, J., Shenfield, G., 1983. Adrenal suppression following extradural steroids.  
538 Anaesthesia 38, 953–956. doi:10.1111/j.1365-2044.1983.tb12025.x
- 539 Karatsoreos, I.N., Bhagat, S.M., Bowles, N.P., Weil, Z.M., Pfaff, D.W., McEwen, B.S., 2010. Endocrine  
540 and physiological changes in response to chronic corticosterone: A potential model of the  
541 metabolic syndrome in mouse. Endocrinology 151, 2117–2127. doi:10.1210/en.2009-1436
- 542 Kirwan, J.R., Bijlsma, J.W., Boers, M., Shea, B., 2007. Effects of glucocorticoids on radiological  
543 progression in rheumatoid arthritis (Review). Cochrane Database Syst. Rev. 1, 1–86.  
544 doi:10.1002/14651858.CD006356
- 545 Korner-Nievergelt, F., Roth, T., von Felten, S., Guelat, J., Almasi, B., Korner-Nievergelt, P., 2015. Package  
546 “blmecco.” doi:<https://cran.r-project.org/web/packages/blmecco/blmecco>
- 547 Lussier, A.L., Caruncho, H.J., Kalynchuk, L.E., 2009. Repeated exposure to corticosterone, but not  
548 restraint, decreases the number of reelin-positive cells in the adult rat hippocampus. Neurosci.  
549 Lett. 460, 170–174. doi:10.1016/j.neulet.2009.05.050
- 550 Marin, M.T., Cruz, F.C., Planeta, C.S., 2007. Chronic restraint or variable stresses differently affect the  
551 behavior, corticosterone secretion and body weight in rats. Physiol. Behav. 90, 29–35.  
552 doi:10.1016/j.physbeh.2006.08.021
- 553 Mateo, J., 2008. Inverted-U shape relationship between cortisol and learning in ground squirrels.  
554 Neurobiol. Learn. Mem. 89, 582–590.
- 555 McAdam, A.G., Boutin, S., Sykes, A.K., Humphries, M.M., 2007. Life histories of female red squirrels and  
556 their contributions to population growth and lifetime fitness. Ecoscience 14, 362–369.

- 557        doi:10.2980/1195-6860(2007)14[362:LHOFRS]2.0.CO;2
- 558    Meikle, A.W., Tyler, F.H., 1977. Potency and duration of action of glucocorticoids. *Am. J. Med.* 63, 200–  
559        207. doi:10.1016/0002-9343(77)90233-9
- 560    Mizoguchi, K., Yuzurihara, M., Ishige, A., Sasaki, H., Chui, D., Tabira, T., 2001. Chronic stress  
561        differentially regulates glucocorticoid negative feedback response in rats.  
562        *Psychoneuroendocrinology* 26, 443–459. doi:10.1016/S0306-4530(01)00004-X
- 563    Morris, H., Jorgensen, J., 1971. Recovery of endogenous pituitary-adrenal function in corticosteroid-  
564        treated children. *J. Pediatr.* 79, 480–488. doi:10.1016/S0022-3476(71)80163-4
- 565    R Core Team, 2017. R version 3.3.3. doi:<https://www.r-project.org/>
- 566    Sapolsky, R.M., Romero, L.M., Munck, A.U., 2000. How do glucocorticoids influence stress responses?  
567        Integrating permissive, suppressive, stimulatory, and preparative actions. *Endocr. Rev.* 21, 55–89.  
568        doi:10.1210/edrv.21.1.0389
- 569    Schielzeth, H., 2010. Simple means to improve the interpretability of regression coefficients. *Methods*  
570        *Ecol. Evol.* 1, 103–113. doi:10.1111/j.2041-210X.2010.00012.x
- 571    Sopinka, N.M., Patterson, L.D., Redfern, J.C., Pleizier, N.K., Belanger, C.B., Midwood, J.D., Crossin, G.T.,  
572        Cooke, S.J., 2015. Manipulating glucocorticoids in wild animals: Basic and applied perspectives.  
573        *Conserv. Physiol.* 3, 1–16. doi:10.1093/conphys/cov031
- 574    Streck, W., Lockwood, M., 1979. Pituitary adrenal recovery following short-term suppression with  
575        corticosteroids. *Am. J. Med.* 66, 910–914. doi:10.1016/0002-9343(79)90444-3

- 576 Touma, C., Sachser, N., Mostl, E., Palme, R., 2003. Effects of sex and time of day on metabolism and  
577 excretion of corticosterone in urine and feces of mice. *Gen. Comp. Endocrinol.* 130, 267–278.  
578 doi:10.1016/S0016-6480(02)00620-2
- 579 Wingfield, J.C., Maney, D.L., Breuner, C.W., Jacobs, J.D., Lynn, S., Ramenofsky, M., Richardson, R.D.,  
580 1998. Ecological bases of hormone - behavior interactions : The “emergency life history stage.”  
581 *Avian Endocrinol. F. Investig. Methods* 38, 191–206. doi:10.1093/icb/38.1.191
- 582 Zera, A.J., 2007. Endocrine analysis in evolutionary-developmental studies of insect polymorphism:  
583 Hormone manipulation versus direct measurement of hormonal regulators. *Evol. Dev.* 9, 499–513.  
584 doi:10.1111/j.1525-142X.2007.00181.xfun
- 585 Zuur, A.F., Ieno, E.N., Elphick, C.S., 2010. A protocol for data exploration to avoid common statistical  
586 problems. *Methods Ecol. Evol.* 1, 3–14. doi:10.1111/j.2041-210X.2009.00001.x
- 587
- 588

589 **Figure captions**

590 **Fig 1.** FGM concentrations in squirrels treated with control (0 mg/day) or with cortisol (6, 8, or 12 mg/day)  
591 treatments. Asterisks (\*) indicate significant differences ( $p < 0.05$ ). Upper and lower hinges correspond  
592 to the first and third quartiles. Upper/lower whiskers extend from the hinge to the highest/lowest value  
593 that is within 1.5x the interquartile range. White diamonds indicate means.

594 **Fig 2.** Effect of number of days since A) female or B) male squirrels were last treated with cortisol (6, 8,  
595 12 mg/day) or control peanut butter on partial residuals of fecal glucocorticoid metabolite (FGM)  
596 concentrations. Values on the x-axis correspond to the number of days elapsed since treatments ended,  
597 and values on y-axis are partial residuals from a LMM that included an interaction between the number  
598 of days after treatment ended and the dosage (0, 6, 8, 12 mg cortisol/day).

599 **Fig 3.** Plasma cortisol from DEX/ACTH challenges conducted on males treated with 0 mg (Control) or 8  
600 mg cortisol/day for 7-14 days (GCs). A) Males were trapped the same day as confirming they consumed  
601 their last treatment. B) Males were trapped the day after being fed their last treatment, but note that  
602 the time they consumed their treatments was not recorded. Note that true baseline samples for cortisol  
603 treated squirrels were highly variable (two samples of 321.2 and 412.7 ng/ml, and two of 1.7 ng/ml).  
604 Means and standard errors are shown.

605 **Fig. 4.** Effect of time elapsed since squirrels entered traps on plasma cortisol concentrations from control  
606 squirrels (0 mg/day), or those treated with GCs (8 mg/day) and (A) sampled the same day as consuming  
607 their last treatment or (B) sampled the day after consuming their last treatment.

608 **Fig. 5.** True baseline plasma cortisol concentrations in squirrels fed cortisol (GC, 8 mg/day) and controls  
609 (0 mg/day) sampled between 1 to 31 hours after confirming they consumed their last treatments.  
610 Different points correspond to different individual squirrels.

611 **Fig. 6.** A) Plasma corticosteroid binding globulin (CBG) and B) percent free cortisol in control and cortisol  
612 treated squirrels subjected to both DEX/ACTH challenges (DEX/ACTH Challenge) and timed bleeds at  
613 intervals of 0-3, 3-6, 6-12 and 18-22 minutes (Timed bleeds). The figure includes squirrels that were  
614 sampled both on the same day as consuming their last treatment and the day after consuming their last  
615 treatment.

616

617 **Fig. 1**

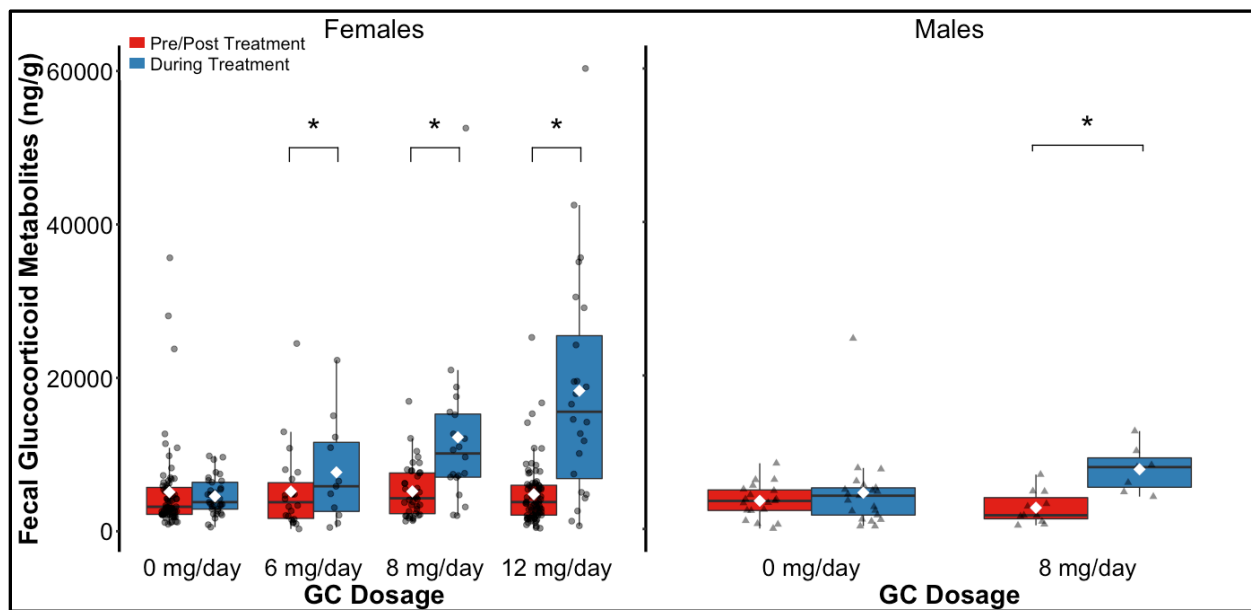

618

619

620 **Fig. 2**

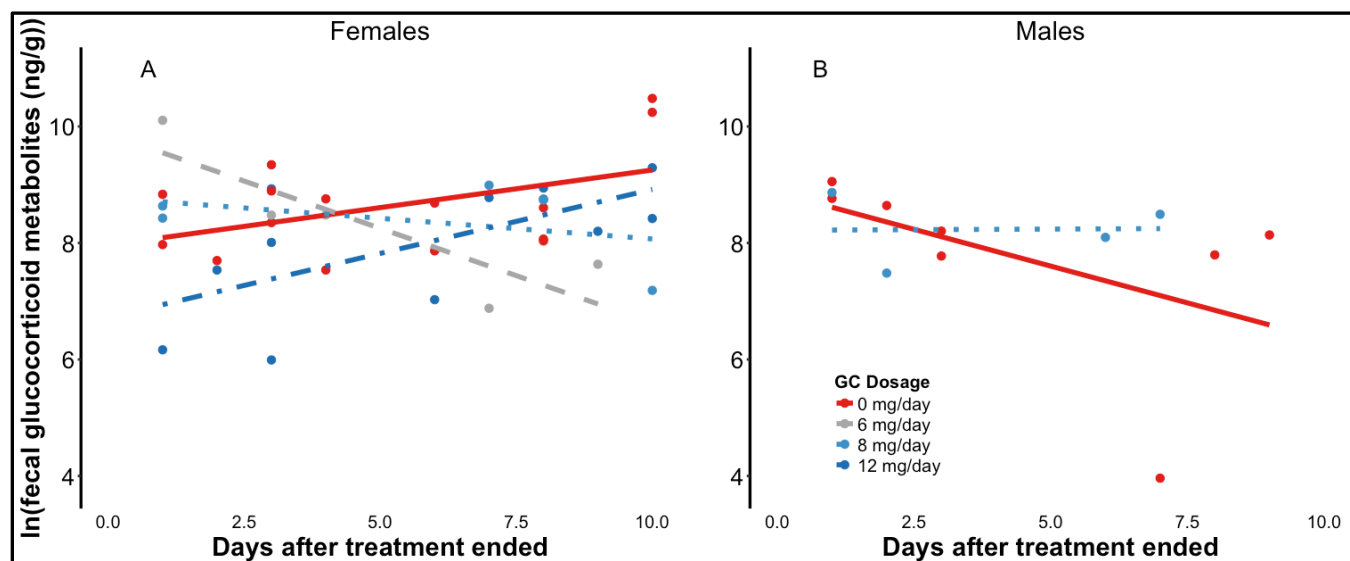

621

622



623 **Fig. 3**

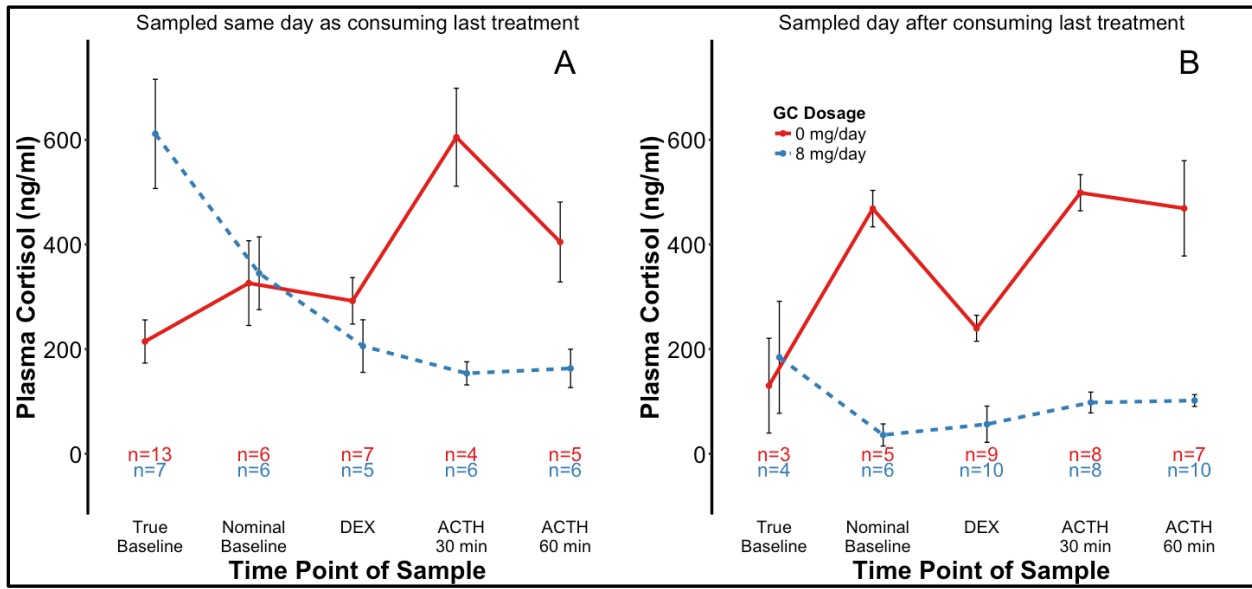

624

625

626 **Fig. 4**

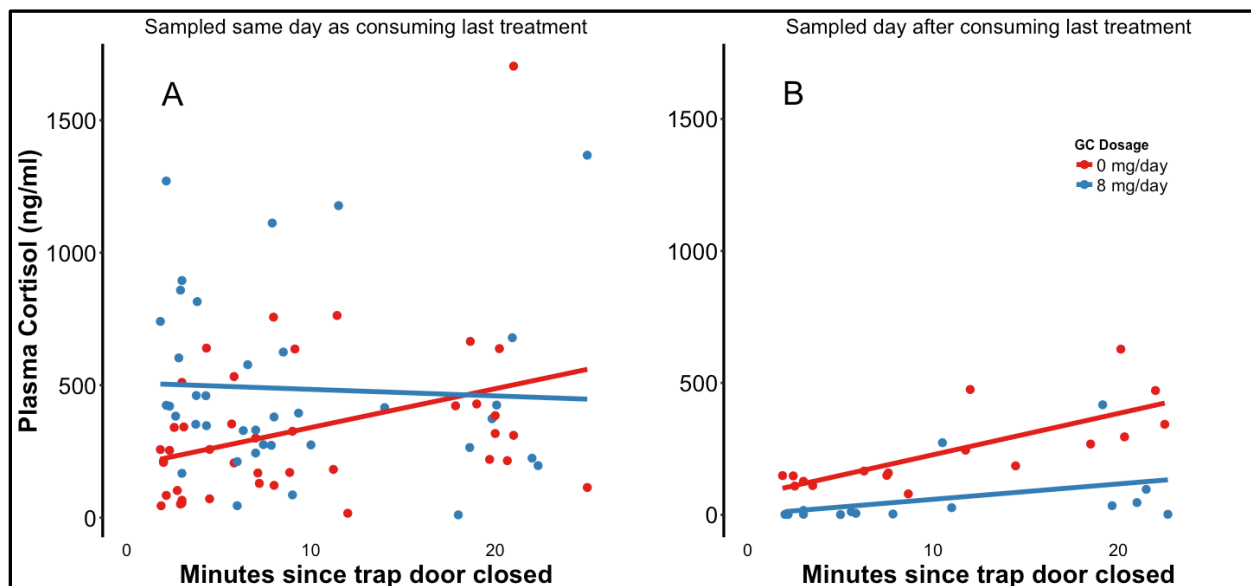

629 **Fig. 5**

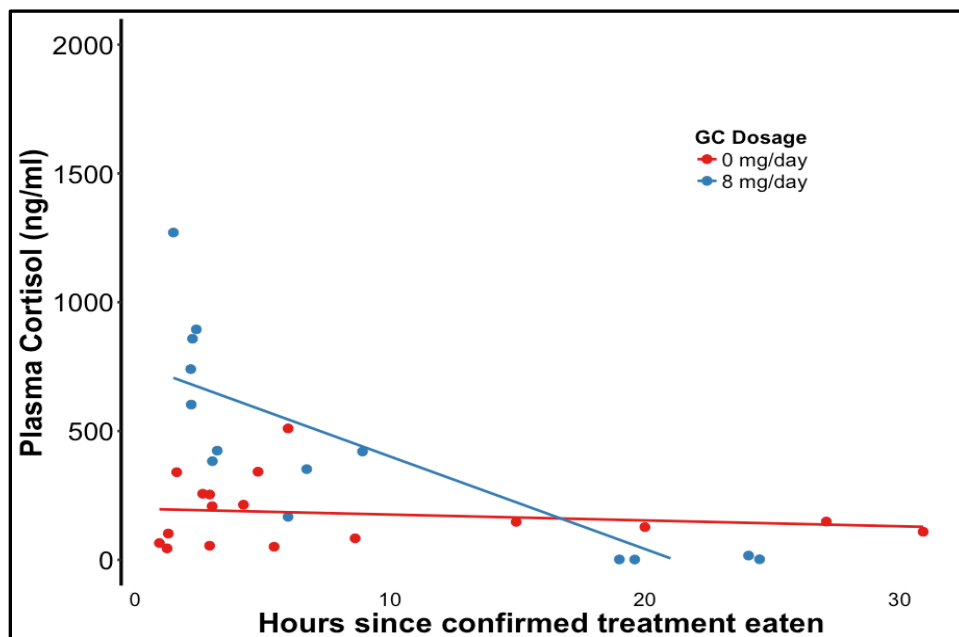

630

631

632 Fig. 6

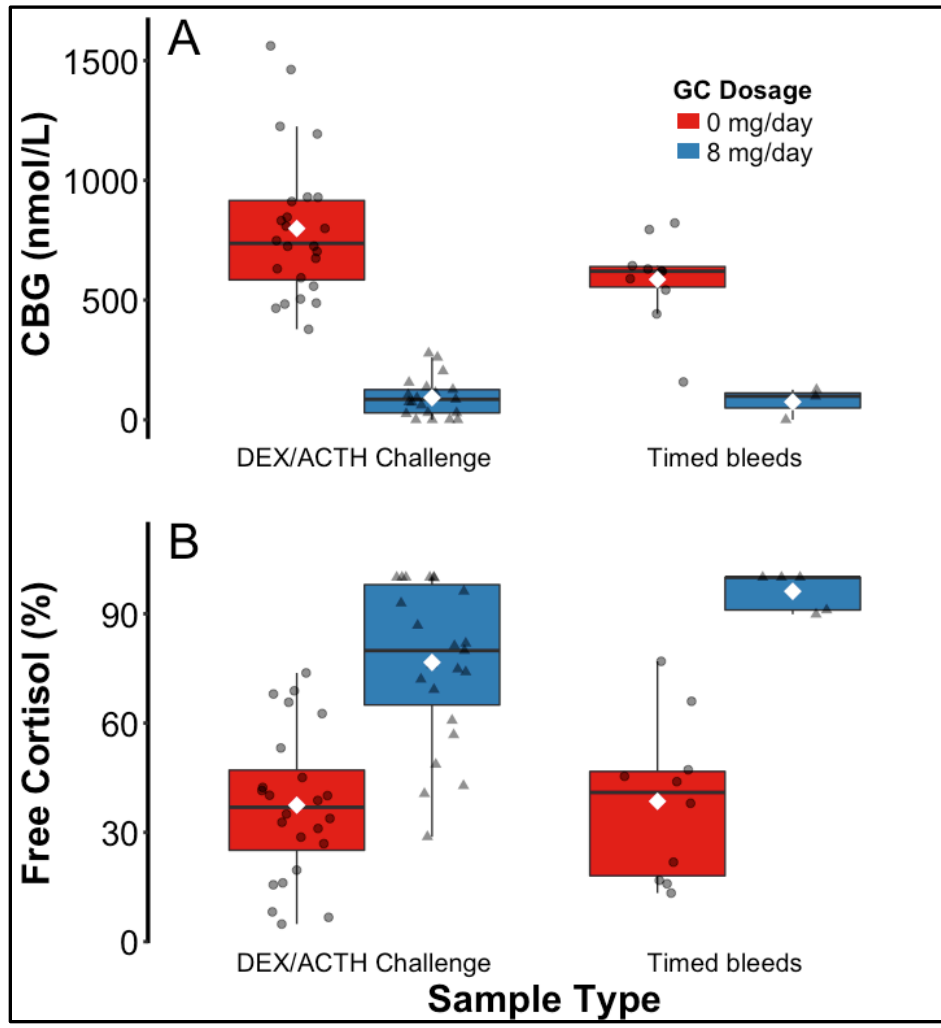

633

634

635 **Table 1:** Sample sizes used in this study. Period refers to when squirrels were treated. Preg: females  
 636 treated from the estimated last third of pregnancy until 5 days post parturition. Lac: females treated  
 637 from days 5 -15 post parturition. NB: males and females treated outside of the breeding season.  
 638 Treatment duration is shown as the range and mean  $\pm$  SEM. Samples (n) refers to the number of fecal  
 639 samples. F refers to females, M refers to males, SD refers to standard deviation.

| Sex | Period | Dose cortisol (mg/day) | Squirrels (n) | Fecal samples (n) | Treatment duration range, mean and SD (days) | Samples (n) during/pre+post treatment |
|-----|--------|------------------------|---------------|-------------------|----------------------------------------------|---------------------------------------|
| F   | Preg   | 0                      | 8             | 34                | 8 – 24 (18.13 $\pm$ 1.74)                    | 11/23                                 |
| F   | Preg   | 6                      | 3             | 21                | 8 – 22 (13.33 $\pm$ 4.37)                    | 7/14                                  |
| F   | Preg   | 8                      | 13            | 60                | 10 – 19 (15.00 $\pm$ 0.69)                   | 20/40                                 |
| F   | Preg   | 12                     | 2             | 11                | 15 – 21 (18.00 $\pm$ 3.00)                   | 2/9                                   |
| F   | Lac    | 0                      | 4             | 20                | 10 (10.00 $\pm$ 0.00)                        | 2/108                                 |
| F   | Lac    | 12                     | 5             | 42                | 10 (10.00 $\pm$ 0.00)                        | 7/35                                  |
| F   | NB     | 0                      | 8             | 49                | 19 – 24 (22.13 $\pm$ 0.67)                   | 17/32                                 |
| F   | NB     | 6                      | 1             | 12                | 21 (21.00 $\pm$ 0.00)                        | 4/8                                   |
| F   | NB     | 12                     | 9             | 48                | 15 – 34 (23.33 $\pm$ 1.69)                   | 17/31                                 |
| M   | NB     | 0                      | 22            | 40                | 6 – 26 (13.14 $\pm$ 1.50)                    | 21/19                                 |
| M   | NB     | 8                      | 12            | 18                | 6 – 15 (10.08 $\pm$ 1.04)                    | 7/11                                  |

640
